# Supplementary material for: Ergonomically designed replaceable and multifunctional triboelectric nanogenerator for a uniform contact
Source: Royal Society of Chemistry journal article supplement (doi:10.1039/c6ra17429a), 2016-01-01
Supplement: c6ra17429a2.pdf [file c6ra17429a2.pdf]

## Supplementary materials

### Ergonomically Designed Replaceable and Multifunctional Triboelectric Nanogenerator for Uniform Contact

*Kyeong Nam Kim<sup>a</sup>, Jin Pyo Lee<sup>a</sup>, Sung-Ho Lee<sup>b</sup>, Sung Chul Lee<sup>b</sup>, and Jeong Min Baik<sup>a,\*</sup>*

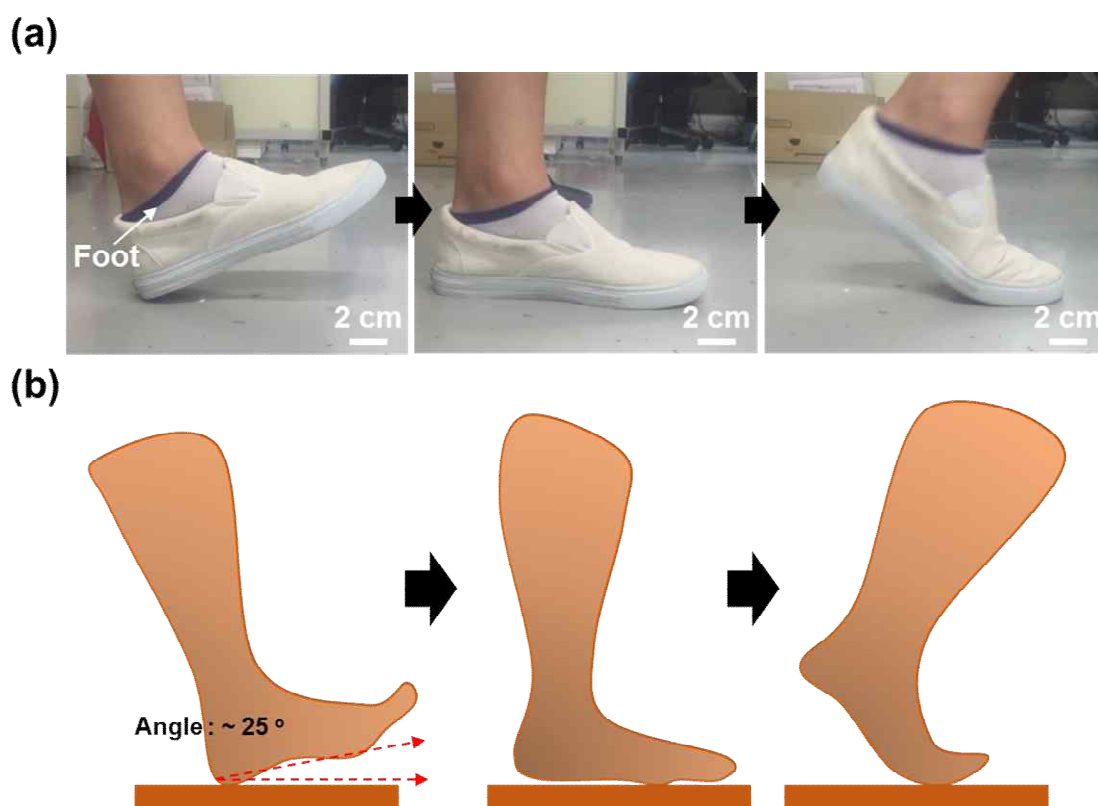

**Figure S1** (a) The real photos and pictures when human walks on the rigid surface showing that the steps start with an angle of approximately 25 °.

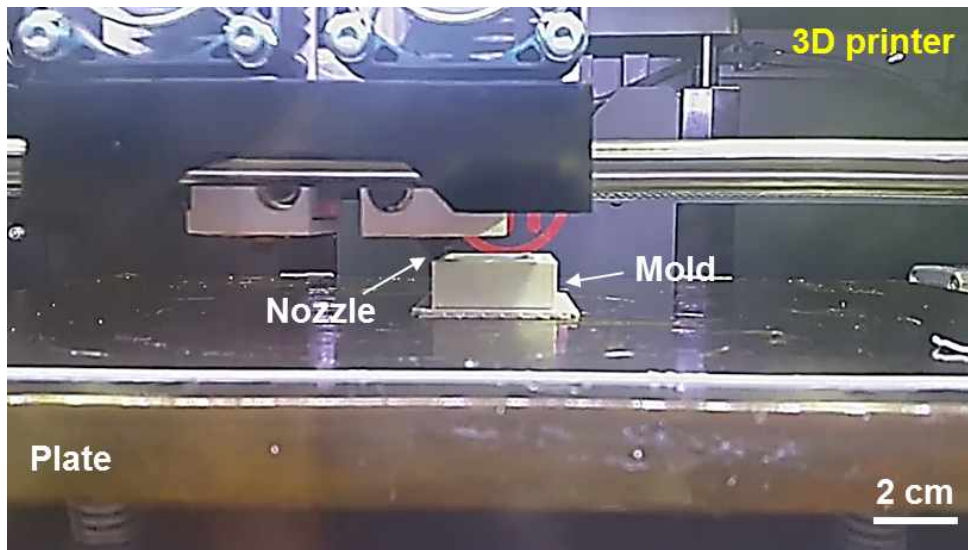

**Figure S2** The video shows a fabrication of mold using FDM 3D printer for casting a sponge-like mesoporous PDMS which is inclined supporter.

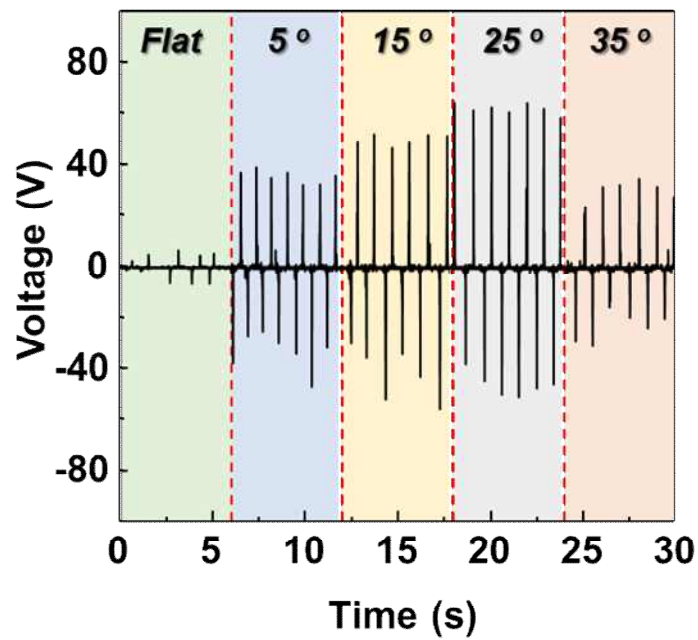

**Figure S3** Output voltage of TENG with various angles of inclined supporter.

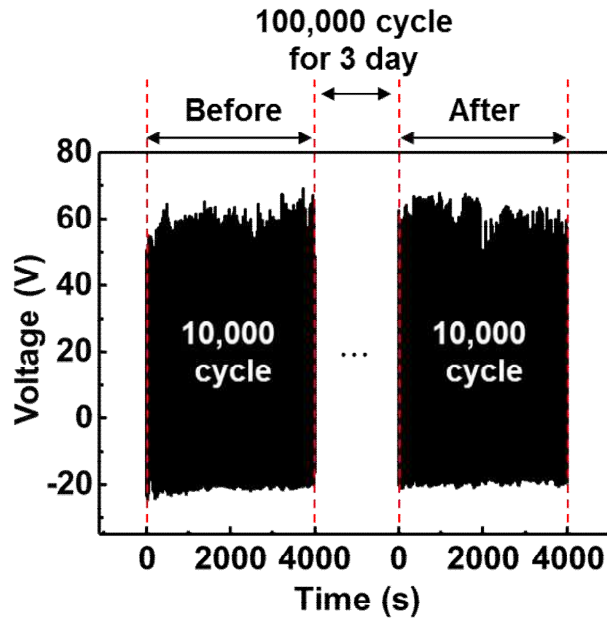

**Figure S4.** The stability test of TENG as a function of time.

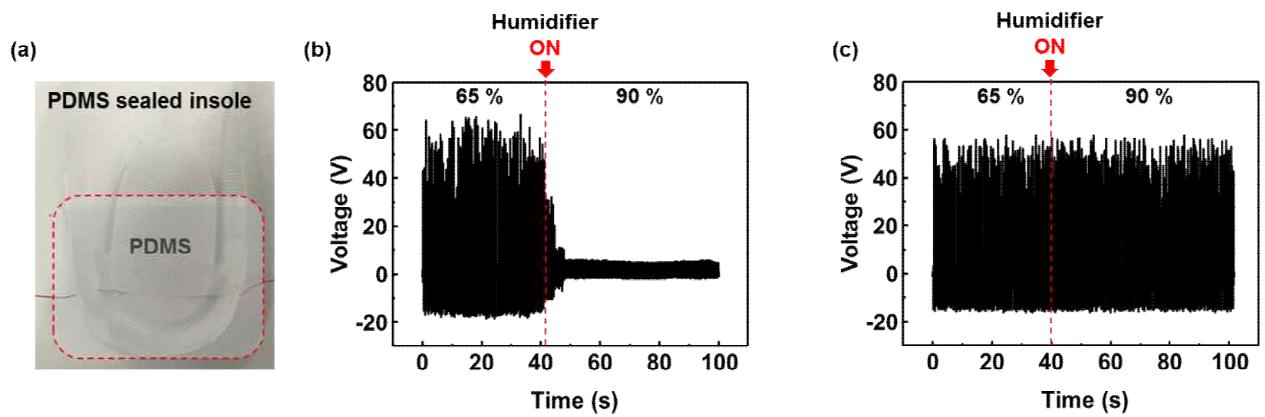

**Figure S5.** (a) The photograph of the sealed TENG. The output voltage of unsealed (b) and sealed (c) TENGs when the humidity is increased from 65 % to 90 %.

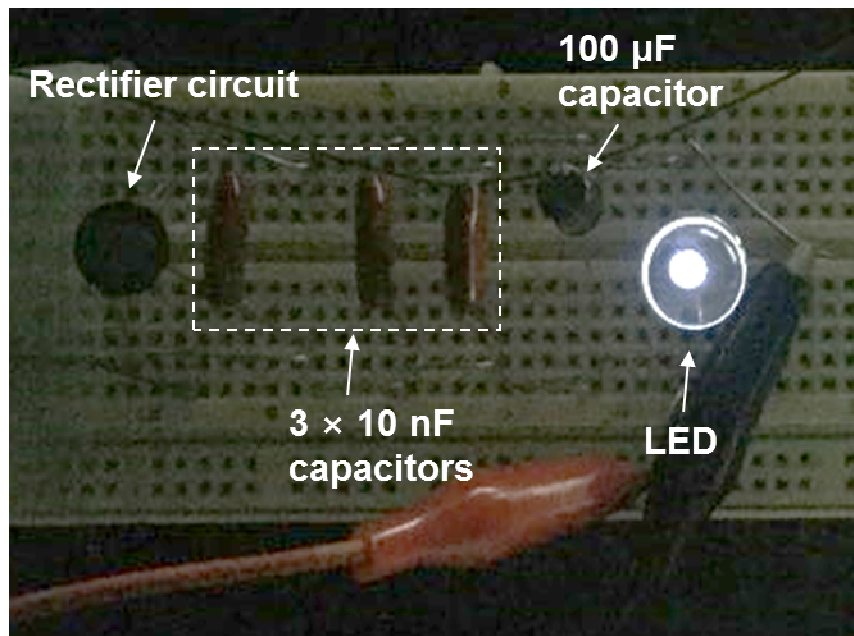

**Figure S6** A circuit of charging system which is composed of the rectifier circuit,  $3 \times 10$  nF,  $100 \mu\text{F}$  capacitors and 1 white LED.

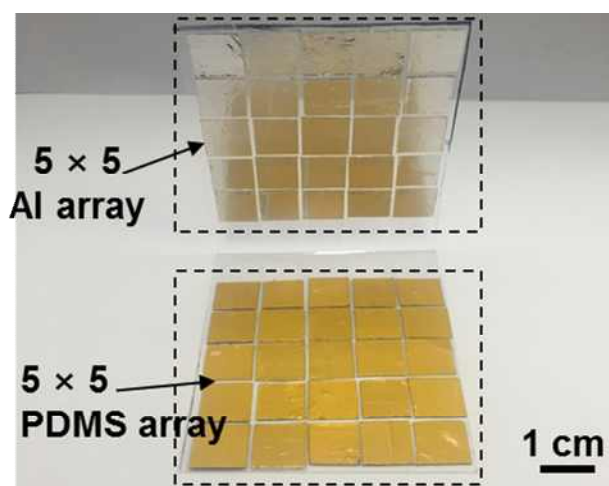

**Figure S7** The photograph of  $5 \times 5$  TENG array consisting of Al and PDMS array.
